# Supplementary material for: Ultrathin nickel hydroxide nanosheet arrays grafted biomass-derived honeycomb-like porous carbon with improved electrochemical performance as a supercapacitive material
Source: PubMed Central journal article supplement (PMC5364545; doi:10.1038/srep45201), 2017-03-24
Supplement: srep45201-s1.pdf [file srep45201-s1.pdf]

## **Supporting Information**

**Ultrathin nickel hydroxide nanosheet arrays grafted biomass-derived honeycomb-like porous carbon with improved electrochemical performance as a supercapacitive material**

Goli Nagaraju, Sung Min Cha and Jae Su Yu\*

Department of Electronic Engineering, Institute for Wearable Convergence Electronics, Kyung Hee University, 1 Seocheon-dong, Giheung-gu, Yongin-si, Gyeonggi-do 446-701, Republic of Korea

\*Address correspondence to [jsyu@khu.ac.kr](mailto:jsyu@khu.ac.kr)

Tel: +82-31-201-3820; Fax: +82-31-206-2820

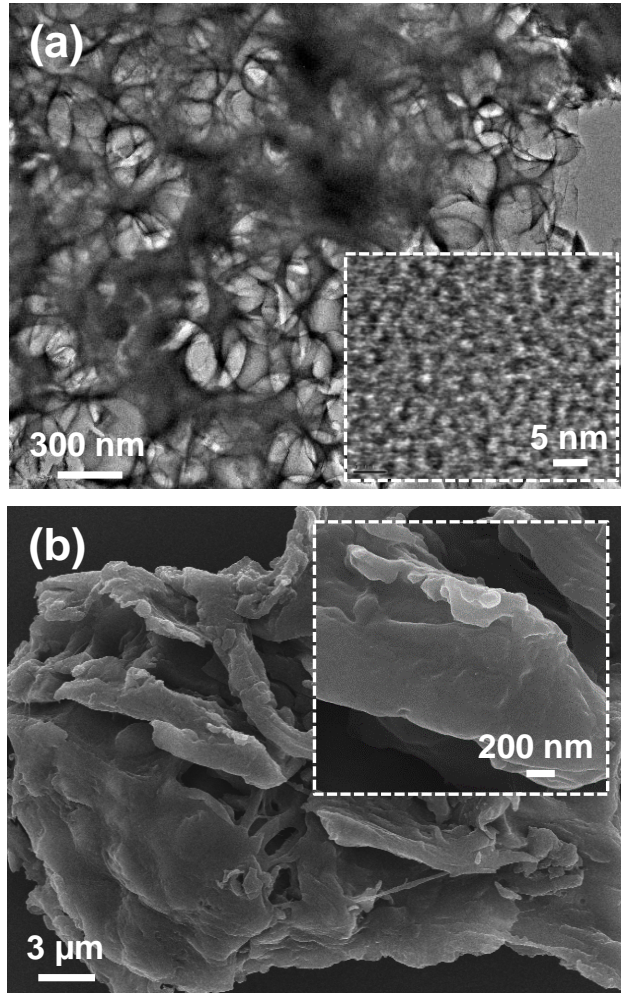

**Figure S1.** (a) TEM images of the HAPC and FE-SEM image of the PC prepared without activating with KOH.

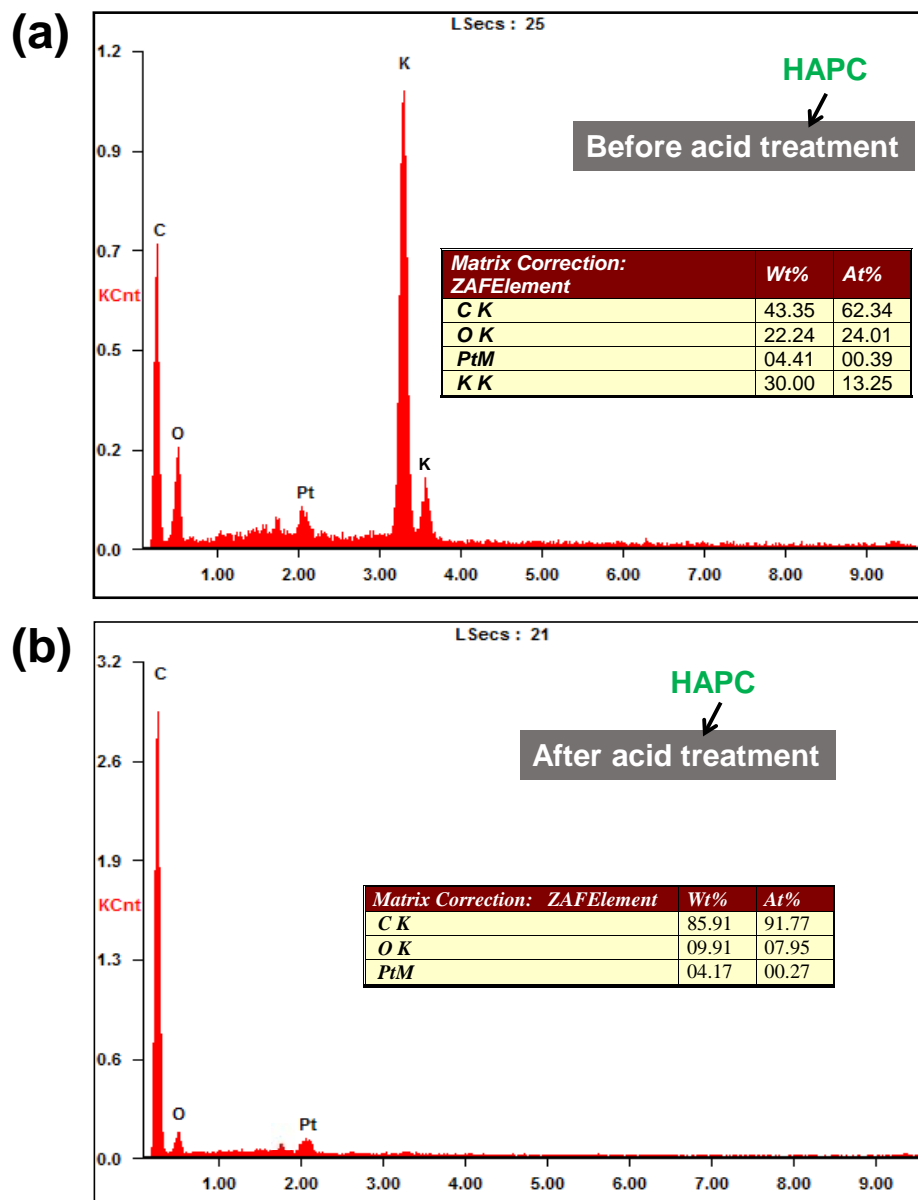

Figure S2. EDX analysis of the HAPC before and after acid treatment.

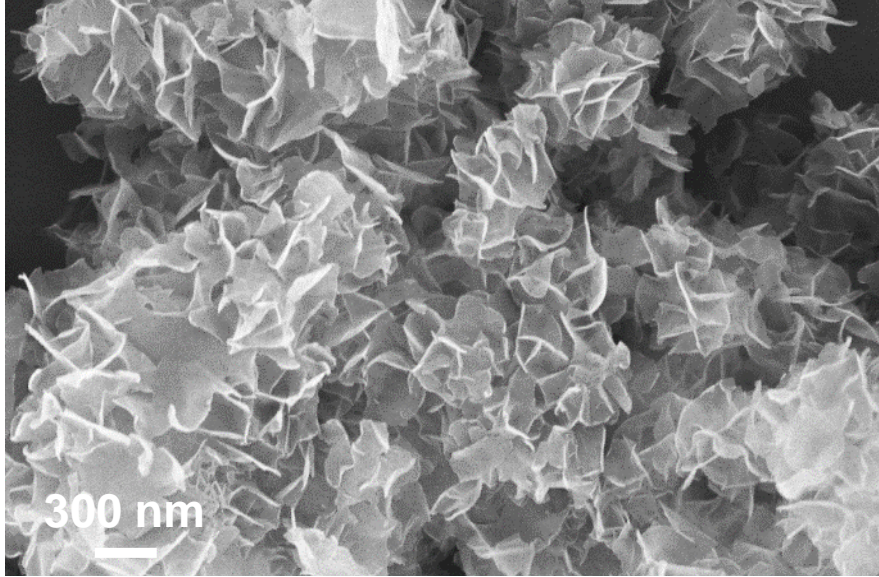

**Figure S3.** FE-SEM image of the prepared Ni(OH)<sub>2</sub> NSs without adding HAPC powder.

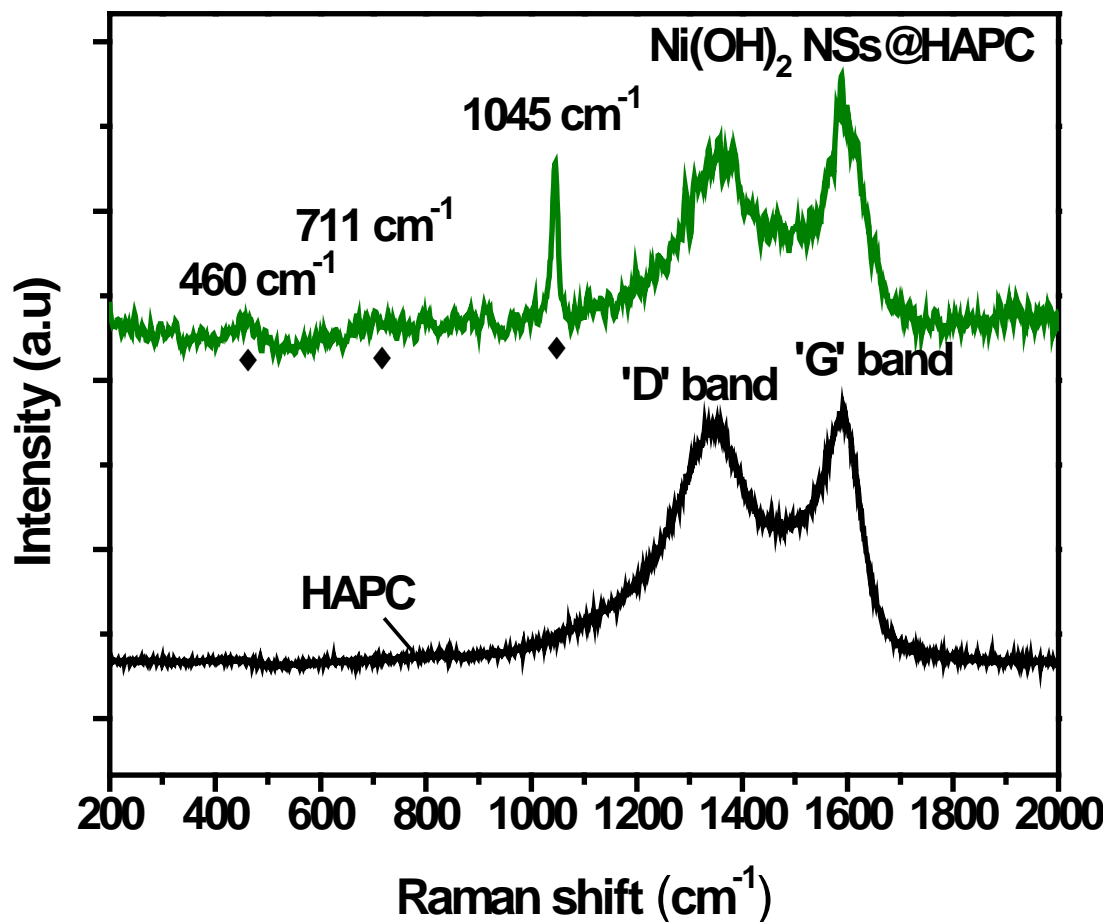

Figure S4. Raman spectra of the HAPC and  $\text{Ni(OH)}_2$ @HAPC composite materials.

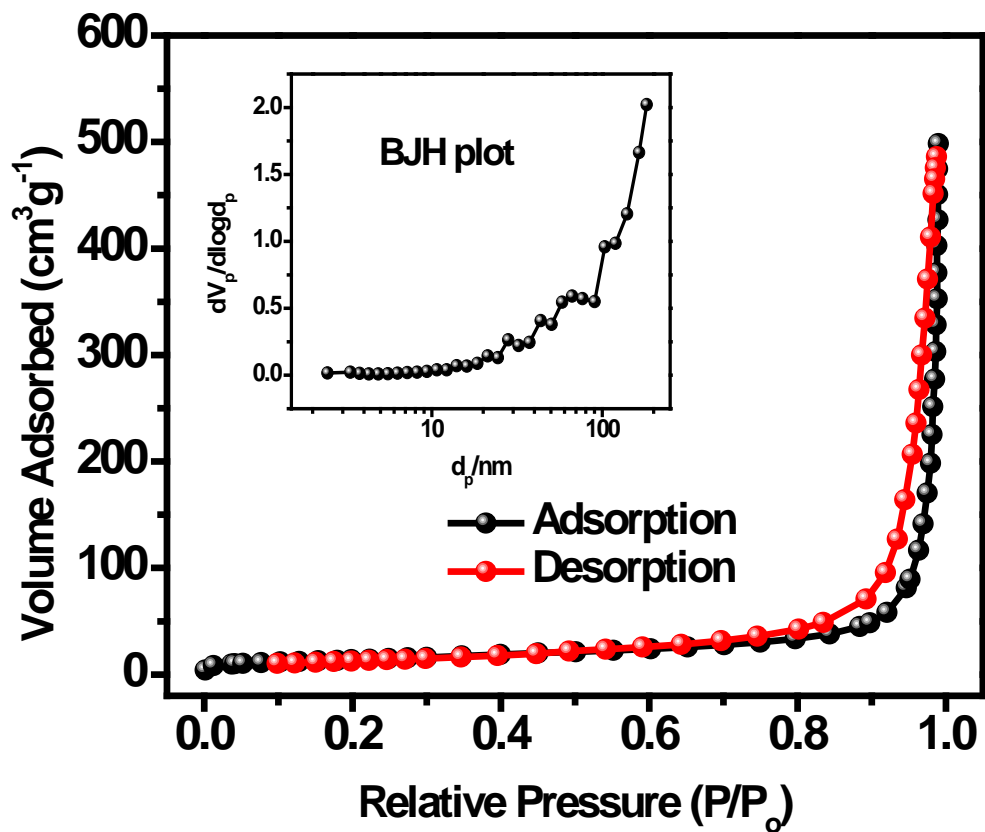

Figure S5. BET surface area of the Ni(OH)<sub>2</sub>@HAPC composite.

Table S1: Electrochemical performance of the previously reported materials with Ni(OH)<sub>2</sub>@HAPC composite.

| Electrode material                    | Current collector | Synthesis method                | Electrolyte                                     | Test condition | Specific capacitance | Ref.      |
|---------------------------------------|-------------------|---------------------------------|-------------------------------------------------|----------------|----------------------|-----------|
| NiO nanodots                          | Ni foam           | High-temperature solution phase | 6 M KOH                                         | 2 A/g          | 856 F/g              | S1        |
| Ni(OH) <sub>2</sub> nanostructures    | Carbon paper      | Reflux process                  | 2 M KOH                                         | 1 A/g          | 332 F/g              | S2        |
| NiO nanotubes                         | Ni foam           | Electro-deposition              | 2 M KOH                                         | 2 A/g          | 675 F/g              | S3        |
| Porous NiO film                       | Ni foil           | CBD method                      | 1 M KOH                                         | 1 A/g          | 309 F/g              | S4        |
| MnO <sub>2</sub> @bio carbon          | Ni foam           | Hydrothermal                    | 1 M Na <sub>2</sub> SO <sub>4</sub>             | 0.2 A/g        | 262.2 F/g            | S5        |
| Ni(OH) <sub>2</sub> @carbon nanotubes | Ni grid           | CBD method                      | 6 M KOH                                         | 0.4 A/g        | 190 mAh/g            | S6        |
| Ni(OH) <sub>2</sub> @activated carbon | Ni foam           | -----                           | 6 M KOH                                         | 1 A/g          | 530 F/g              | S7        |
| rGO@Ni nanoparticles                  | Carbon cloth      | Hydrothermal                    | 0.05 M PBS+KCl+NaH <sub>2</sub> PO <sub>4</sub> | 0.2 A/g        | 70 F/g               | S8        |
| NiO hollow spheres                    | Ni foam           | CBD method                      | 2 M KOH                                         | 1 A/g          | 346 F/g              | S9        |
| NiO film                              | Ni foam           | Ammonia evaporation method      | 1 M KOH                                         | 2 A/g          | 232 F/g              | S10       |
| Nickel oxide @hydroxide               | Stainless steel   | Chemical precipitation method   | 0.5 M KOH                                       | 10 mV/s        | 108 F/g              | S11       |
| Ni(OH) <sub>2</sub> @HAPC composite   | Carbon cloth      | Solvothermal method             | 1 M KOH                                         | 1 A/g          | 916.4 F/g            | This work |

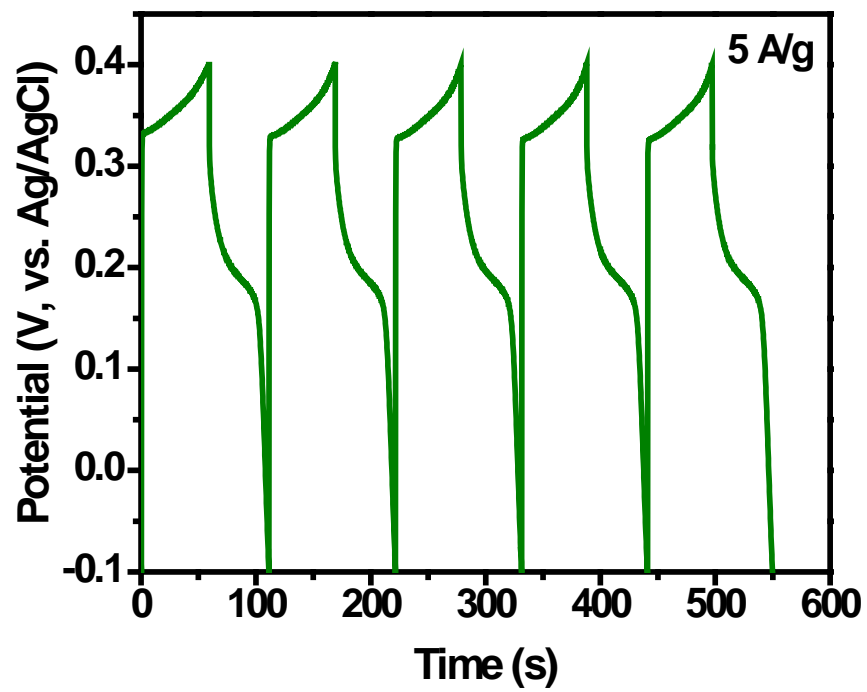

**Figure S6.** First five GCD cycles of the Ni(OH)<sub>2</sub>@HAPC composite measured at a current density of 5 A/g.



## References

- 1 Zheng, X. et al. 3D interconnected macro-mesoporous electrode with self-assembled NiO nanodots for high-performance supercapacitor-like Li-ion battery. *Nano Energy* 22, 269-277, doi:http://dx.doi.org/10.1016/j.nanoen.2016.02.017 (2016).
- 2 Weihong, L., Jieyi, Y., Tayirjan, T. I., De-Quan, Y. & Edward, S. Aqueous synthesis and growth of morphologically controllable, hierarchical Ni(OH)<sub>2</sub> nanostructures. *Materials Research Express* 2, 075011 (2015).
- 3 Cao, F., Pan, G. X., Xia, X. H., Tang, P. S. & Chen, H. F. Synthesis of hierarchical porous NiO nanotube arrays for supercapacitor application. *J. Power Sources* 264, 161-167, doi:http://dx.doi.org/10.1016/j.jpowsour.2014.04.103 (2014).
- 4 Xia, X.-h., Tu, J.-p., Wang, X.-l., Gu, C.-d. & Zhao, X.-b. Hierarchically porous NiO film grown by chemical bath deposition via a colloidal crystal template as an electrochemical pseudocapacitor material. *J. Mater. Chem.* 21, 671-679, doi:10.1039/c0jm02784g (2011).
- 5 Li, Y. et al. Fabrication of manganese dioxide nanoplates anchoring on biomass-derived cross-linked carbon nanosheets for high-performance asymmetric supercapacitors. *J. Power Sources* 300, 309-317, doi:http://dx.doi.org/10.1016/j.jpowsour.2015.09.077 (2015).
- 6 Wang, Y.-g., Yu, L. & Xia, Y.-y. Electrochemical Capacitance Performance of Hybrid Supercapacitors Based on Ni(OH)<sub>2</sub>/Carbon Nanotube Composites and Activated Carbon. *J. Electrochem. Soc.* 153, A743-A748, doi:10.1149/1.2171833 (2006).
- 7 Park, J. H., Park, O. O., Shin, K. H., Jin, C. S. & Kim, J. H. An Electrochemical Capacitor Based on a Ni(OH)<sub>2</sub>/Activated Carbon Composite Electrode. *Electrochemical and Solid-State Letters* 5, H7-H10, doi:10.1149/1.1432245 (2002).
- 8 Valipour, A., Hamnabard, N. & Ahn, Y.-H. Performance evaluation of highly conductive graphene (RGOHI-AcOH) and graphene/metal nanoparticle composites (RGO/Ni) coated on carbon cloth for supercapacitor applications. *RSC Adv.* 5, 92970-92979, doi:10.1039/c5ra14806e (2015).
- 9 Yan, X. et al. Rational synthesis of hierarchically porous NiO hollow spheres and their supercapacitor application. *Mater. Lett.* 95, 1-4, doi:http://dx.doi.org/10.1016/j.matlet.2012.12.073 (2013).
- 10 Zhang, Y. Q. et al. Self-assembled synthesis of hierarchically porous NiO film and its application for electrochemical capacitors. *J. Power Sources* 199, 413-417, doi:http://dx.doi.org/10.1016/j.jpowsour.2011.10.065 (2012).
- 11 Wu, M.-S. & Hsieh, H.-H. Nickel oxide/hydroxide nanoplatelets synthesized by chemical precipitation for electrochemical capacitors. *Electrochim. Acta* 53, 3427-3435, doi:http://dx.doi.org/10.1016/j.electacta.2007.12.005 (2008).
